# Supplementary material for: Facile preparation of novel quaternary g-C3N4/Fe3O4/AgI/Bi2S3 nanocomposites: magnetically separable visible-light-driven photocatalysts with significantly enhanced activity
Source: Royal Society of Chemistry journal article supplement (doi:10.1039/c6ra12414c), 2016-01-01
Supplement: c6ra12414c1.pdf [file c6ra12414c1.pdf]

Supporting materials for:

**Facile preparation of novel quaternary g-C<sub>3</sub>N<sub>4</sub>/Fe<sub>3</sub>O<sub>4</sub>/AgI/Bi<sub>2</sub>S<sub>3</sub> nanocomposites:  
Magnetically separable visible-light-driven photocatalysts with significantly enhanced  
activity**

Anise Akhundi, Aziz Habibi-Yangjeh\*

*Department of Chemistry, Faculty of Science, University of Mohaghegh Ardabili, P.O. Box  
179, Ardabil, Iran.*

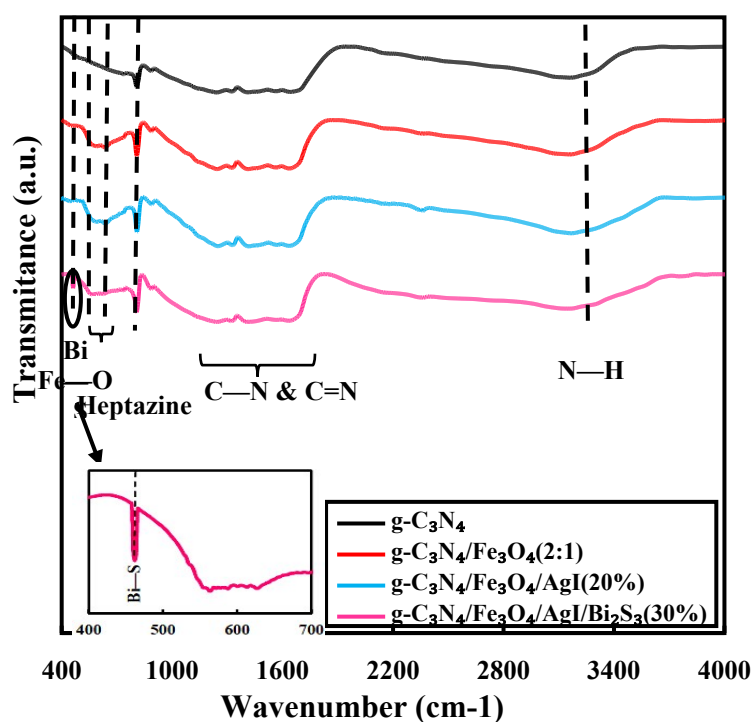

**Fig. 1S.** FT-IR spectra for the g-C<sub>3</sub>N<sub>4</sub>, g-C<sub>3</sub>N<sub>4</sub>/Fe<sub>3</sub>O<sub>4</sub>, and g-C<sub>3</sub>N<sub>4</sub>/Fe<sub>3</sub>O<sub>4</sub>/AgI/Bi<sub>2</sub>S<sub>3</sub> (30%) samples.

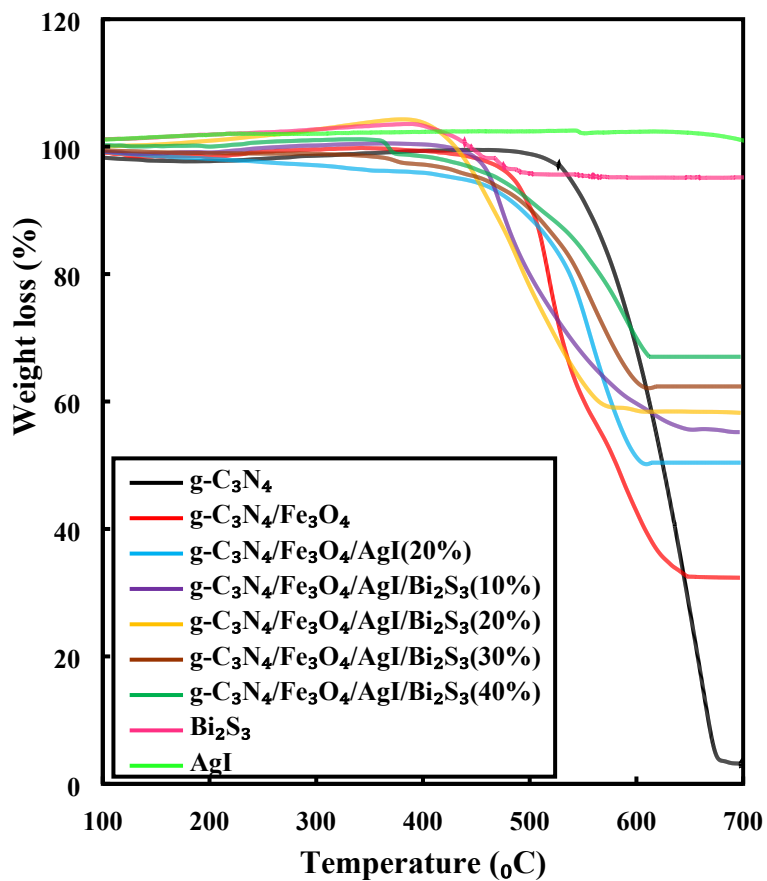

**Fig. 2S.** TGA curves for the g-C<sub>3</sub>N<sub>4</sub>, g-C<sub>3</sub>N<sub>4</sub>/Fe<sub>3</sub>O<sub>4</sub>, and g-C<sub>3</sub>N<sub>4</sub>/Fe<sub>3</sub>O<sub>4</sub>/AgI/Bi<sub>2</sub>S<sub>3</sub> nanocomposites with different weight percents of Bi<sub>2</sub>S<sub>3</sub> along with the pure AgI and Bi<sub>2</sub>S<sub>3</sub> samples.

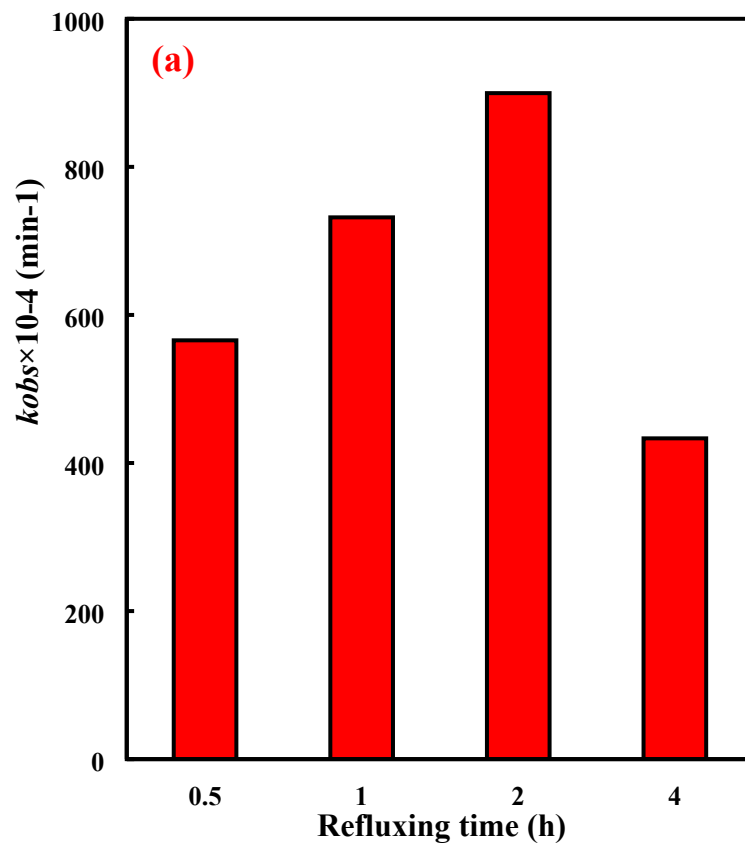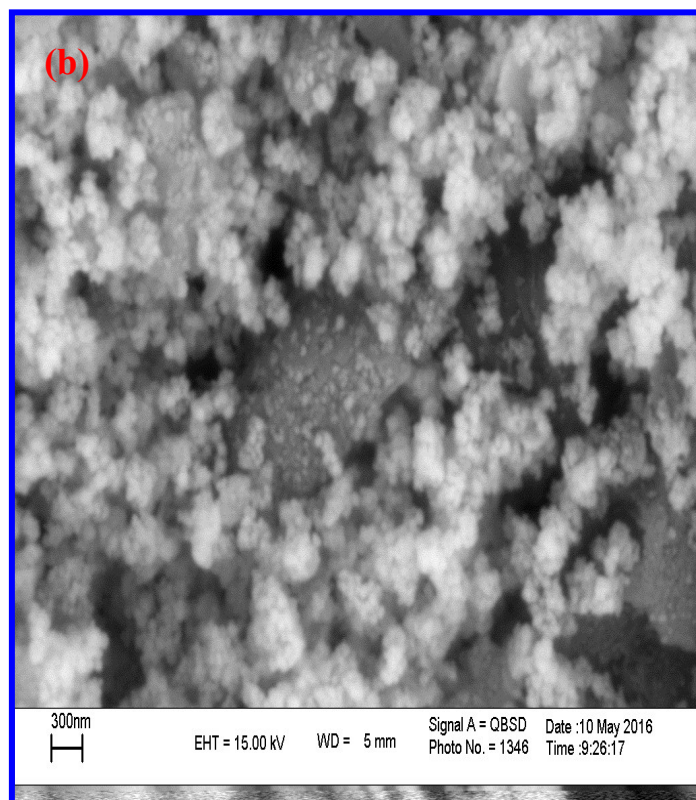

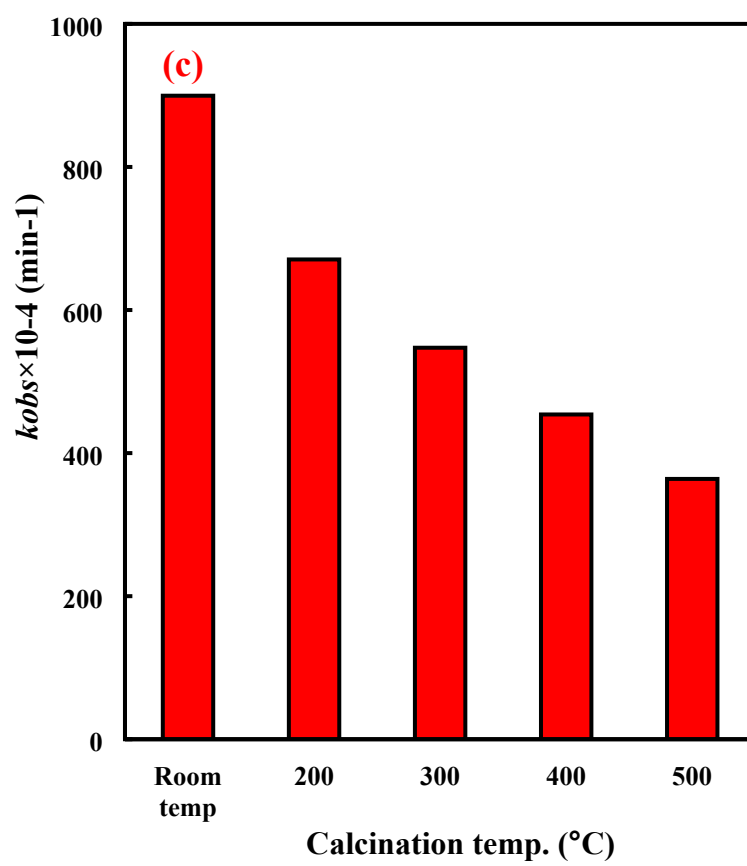

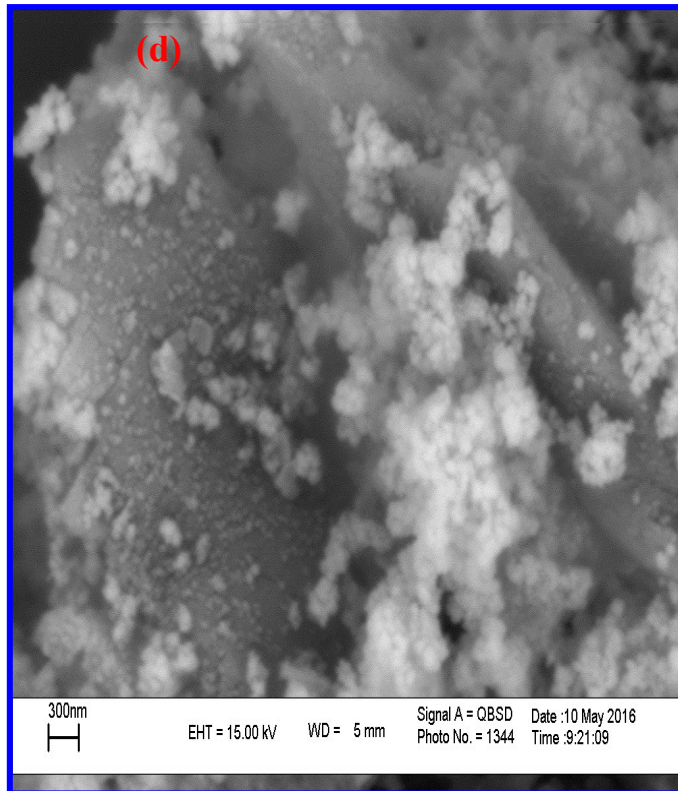

**Fig. 3S.** (a) The degradation rate constants of RhB over the g-C<sub>3</sub>N<sub>4</sub>/Fe<sub>3</sub>O<sub>4</sub>/AgI/Bi<sub>2</sub>S<sub>3</sub> (30%) nanocomposite prepared at different refluxing times. (b) SEM image of the g-C<sub>3</sub>N<sub>4</sub>/Fe<sub>3</sub>O<sub>4</sub>/AgI/Bi<sub>2</sub>S<sub>3</sub> (30%) nanocomposite prepared by refluxing for 4 h. (c) The degradation rate constants of RhB over the g-C<sub>3</sub>N<sub>4</sub>/Fe<sub>3</sub>O<sub>4</sub>/AgI/Bi<sub>2</sub>S<sub>3</sub> (30%) nanocomposite calcined at different temperatures. (d) SEM image of the g-C<sub>3</sub>N<sub>4</sub>/Fe<sub>3</sub>O<sub>4</sub>/AgI/Bi<sub>2</sub>S<sub>3</sub> (30%) nanocomposite calcined at 500 °C for 2 h.

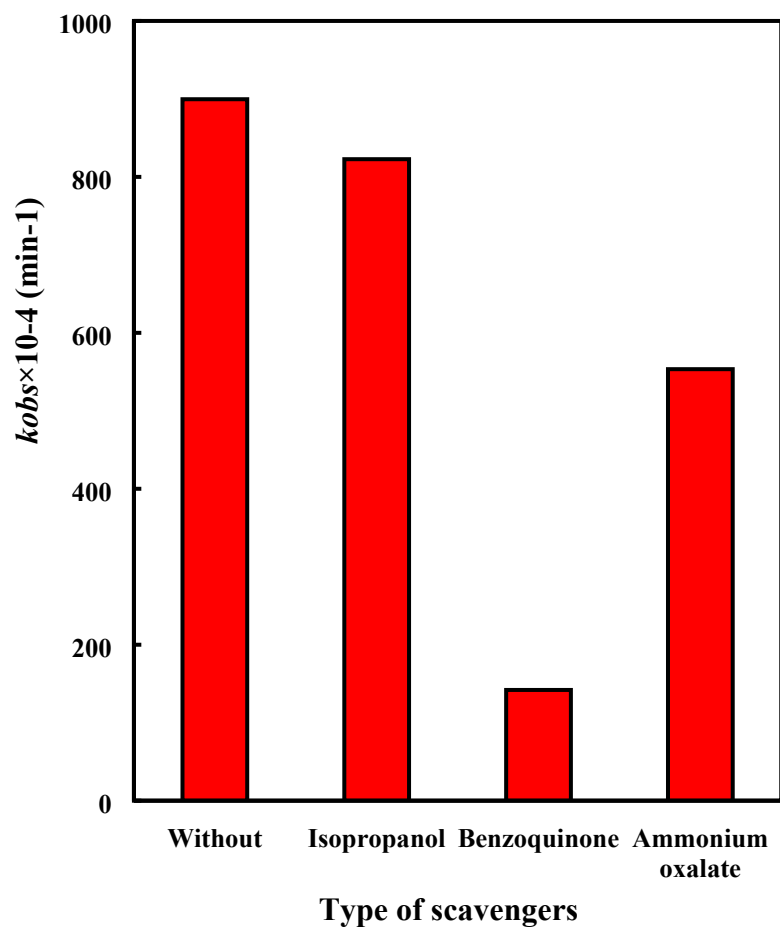

**Fig. 4S.** The degradation rate constants of RhB over the  $g\text{-C}_3\text{N}_4/\text{Fe}_3\text{O}_4/\text{AgI}/\text{Bi}_2\text{S}_3$  (30%) nanocomposite in presence of various scavengers.

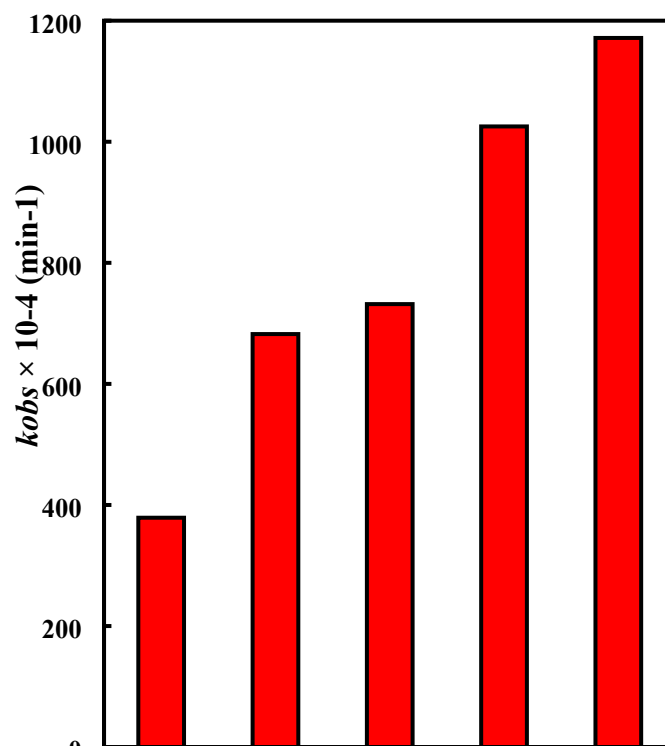

**Fig. 5S.** Effect of solution pH on the degradation rate constant of RhB over the g-  
 $C_3N_4/Fe_3O_4/AgI/Bi_2S_3$  (30%) nanocomposite.
